## Population-based neuroimaging reveals traces of childbirth in the maternal brain

Ann-Marie G. de Lange<sup>1\*</sup>, Tobias kaufmann<sup>1</sup>, Dennis van der Meer<sup>1,2</sup>, Luigi Maglanoc<sup>1,3</sup>, Dag Alnæs<sup>1</sup>, Torgeir Moberget<sup>1</sup>, Gwenaëlle Douaud<sup>4</sup>, Ole A. Andreassen<sup>1</sup>, Lars T. Westlye<sup>1,3\*</sup>

---

<sup>1</sup> NORMENT Norwegian Centre for Mental Disorders Research, Institute of Clinical Medicine, University of Oslo, & Division of Mental Health and Addiction, Oslo University Hospital

<sup>2</sup> School of Mental Health and Neuroscience, Faculty of Health, Medicine and Life Sciences, Maastricht University, The Netherlands

<sup>3</sup> Department of Psychology, University of Oslo, Norway

<sup>4</sup> Wellcome Centre for Integrative Neuroimaging, Oxford Centre for Functional Magnetic Resonance Imaging of the Brain (FMRIB), Nuffield Department of Clinical Neurosciences, John Radcliffe Hospital, University of Oxford, Oxford, UK

**\*Corresponding authors:** Ann-Marie G. de Lange, Ph.D (a.m.g.d.lange@psykologi.uio.no)

& Lars T. Westlye, Ph.D (l.t.westlye@psykologi.uio.no). University of Oslo, Department of Psychology, PoBox 1094, Blindern, 0317 Oslo, Norway

1 **Abstract**

2 Pregnancy and childbirth involve maternal brain adaptations that promote attachment to and protection  
3 of the newborn. Using brain imaging and machine learning, we provide evidence for a positive relation-  
4 ship between number of childbirths and a ‘younger-looking’ brain in 12,021 women, which could not be  
5 explained by common genetic variation. The findings demonstrate that parity can be linked to brain  
6 health later in life.

7 During pregnancy and postpartum, fundamental biological processes are instigated to support maternal  
8 adaptation and ensure protection of the offspring [1]. In rodents, brain adaptations across pregnancy  
9 and postpartum include altered neurogenesis in the dentate gyrus [2], and changes in volume, dendritic  
10 morphology, and cell proliferation in the hippocampus [1, 3]. In humans, reduction in total brain vol-  
11 ume has been observed during pregnancy, with reversion occurring within six months of parturition [4].  
12 Regional changes in brain structure are evident during the postpartum period, with effects depending  
13 on region and time since delivery [5–8]. While some maternal brain changes revert postpartum, others  
14 extend well beyond this phase [1, 7–9] and may influence the course of neurobiological aging later in  
15 life. Some regional grey matter changes have been found to endure for at least 2 years post-pregnancy  
16 in humans [1], and aged parous rats have increased hippocampal long-term potentiation and show fewer  
17 signs of brain aging [1, 10]. In addition to the direct and indirect bodily and environmental adaptations  
18 in response to pregnancy and child-rearing, such long-lasting effects on brain health in humans could  
19 also reflect genetic pleiotropy, as reproductive behaviors are complex, heritable traits with a polygenic  
20 architecture that partly overlaps with a range of other traits that influence brain-health trajectories [11].

21 Based on the evidence of long-lasting effects of parity on the maternal brain, we investigated struc-  
22 tural brain characteristics in 12,021 women from the UK Biobank, hypothesizing that women who had  
23 given (live) birth ( $n = 9568$ ) would show less evidence of brain aging compared to their nulliparous peers  
24 ( $n = 2453$ ). We used machine learning and brain age prediction to test I) if a classifier could identify  
25 women as parous or nulliparous based on morphometric brain characteristics, and II) whether brain age  
26 gap (estimated brain age – chronological age) differed between parous and nulliparous women. Mean  
27 age ( $\pm$  SD) was 54.72 (7.29) years for the full sample; 55.23 (7.22) years for parous and 52.79 (7.23)  
28 years for nulliparous women. To investigate the impact of number of childbirths, we tested for associa-  
29 tions between number of births and the probabilistic scores from the group classification and brain age  
30 gap, respectively, in addition to comparing women who had given 1-2 births, 3-4 births, and 5-8 births  
31 to nulliparous women, respectively. To parse the effects of common genetic variation, we performed a

32 genome-wide association study (GWAS) on the phenotype *number of births* in 271,312 healthy women in  
33 the UK Biobank (excluding our MRI subsample). We then computed polygenic score for each European  
34 individual in our MRI subsample ( $N = 10,289$ , Online Methods), and tested for associations between  
35 polygenic scores and the probability score from the group classification and brain age gap, respectively.  
36 To estimate genetic overlap between number of births and a range of other complex traits, we used linkage  
37 disequilibrium score regression based on previously published GWAS results [12–17].

38 Figure 1 and Table 1 show the results from the group classification and the brain age prediction.  
39 The probability of being classified as parous was positively related to number of births ( $r = 0.05$ ,  $p =$   
40  $2.30 \times 10^{-4}$ ,  $CI = [-0.02, -0.08]$ ), indicating a higher probability for multiparous women to be labeled  
41 correctly. In the brain age analysis, the correlation between predicted and chronological age was  $r = 0.61$ ,  
42  $p = < .0001$ ,  $CI = [0.6, 0.62]$ , and  $RMSE = 5.78$  ( $SD = 0.10$ ),  $p = < .0001$ . To account for age-related bias  
43 in the predicted age [18, 19], we employed a quadratic regression to the data (Equation 1, Online Methods).  
44 Bias-corrected brain age gap correlated negatively with number of births ( $r = 0.07$ ,  $p = 5.00 \times 10^{-16}$ ,  $CI$   
45  $= [-0.09, -0.06]$ ), indicating a ‘younger looking’ brain in multiparous women. The correlation remained  
46 significant when including only parous women ( $r = 0.03$ ,  $p = 3.14 \times 10^{-3}$ ,  $CI = [-0.05, -0.01]$ ). To assess  
47 the reproducibility of these effects, the brain age analysis was rerun using predicted brain age estimates  
48 based on an independent approach and training set [20–22]. In brief, the results were consistent with the  
49 main findings (see Online Methods for full description). To investigate relevant confound variables, we  
50 performed additional analyses testing the associations between brain age gap and number of childbirths  
51 when accounting for ethnic background, education, body mass index, and age at first birth. None of these  
52 variables fully explained the differences in brain age gap between parous and nulliparous women. The  
53 results are provided in Supplementary Tables 2-5.

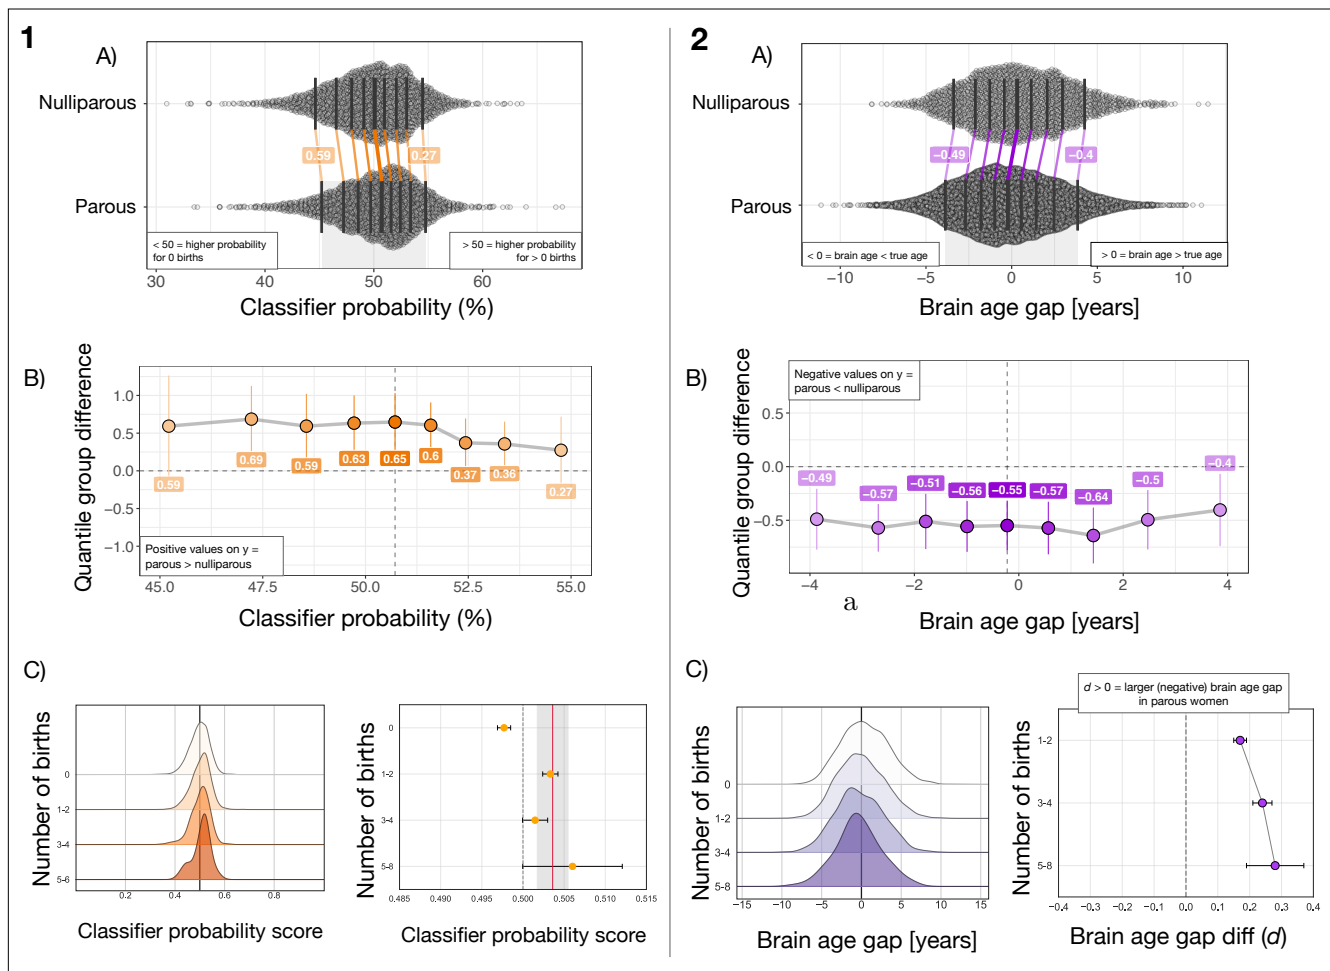

**Figure 1: Panel 1** A) The distributions of classifier probability scores in nulliparous and parous women. The x-axis refers to the estimated percentage probability of having given birth. The dark vertical lines mark the deciles of the distributions. The matching deciles in the two groups are joined by colored lines, showing a uniform, positive shift in the group of parous women. B) The portion of the x-axis in plot A marked by the grey shaded area at the bottom of the plot. The y-axis shows the group differences between deciles (parous group minus nulliparous group), while the x-axis shows the deciles of the parous group. C) Left plot: The distribution of individual-level classifier probability scores in subgroups of women based on number of childbirths. The plot shows a positive shift in the distribution with a larger number of births. The plot is displayed with balanced group samples ( $n$  nulliparous women = 2453, 1-2 births = 1773, 3-4 births = 645, and 5-6 births = 35, see Online Methods for details). Darker color indicates a larger number of births. Right plot: Mean classifier probability for each of the subgroups. The red vertical line shows the mean classifier probability in the groups of parous women. The lighter grey colored area illustrates the standard deviation. The error bars represent the standard error on the means. The dashed line indicates 0.5 on the x-axis. **Panel 2** A) The distributions of bias corrected, estimated brain age gap in nulliparous and parous women. Negative values indicate a predicted brain age that is lower than chronological age, i.e. a ‘younger-looking’ brain. The plot shows a uniform, negative shift in the group of parous women. B) The y-axis shows the group differences between deciles (parous group minus nulliparous group), while the x-axis shows the deciles of the parous group. C) Left plot: The distribution of estimated brain age gap in subgroups of women based on number of childbirths. The plot shows a negative shift in the distribution with a larger number of births. Number of subjects: nulliparous women = 2453, 1-2 births = 6945, 3-4 births = 2497, and 5-8 births = 126. Darker color indicates a larger number of births. Right plot: Difference in brain age gap between each of the subgroups and nulliparous women as measured by Cohen’s  $d$ . The error bars represent the standard deviation of the effect size [23]. Higher values on the x-axis indicate a larger effect size. The dashed line indicates 0 on the x-axis.

| Classifier probability score and number of childbirths |                        |              |                     |                        |             |                        |
|--------------------------------------------------------|------------------------|--------------|---------------------|------------------------|-------------|------------------------|
| Pearson's $r$                                          |                        |              | Logistic regression |                        |             |                        |
| $r$                                                    | $p$                    | 95% CI       | $\beta$             | SE                     | $z$         | $p$                    |
| 0.05                                                   | $2.30 \times 10^{-4}$  | 0.02, 0.08   | 2.19                | 0.73                   | 3.01        | $2.69 \times 10^{-3}$  |
| Brain age gap and number of childbirths                |                        |              |                     |                        |             |                        |
| $r$                                                    | $p$                    | 95% CI       | $\beta$             | SE                     | $z$         | $p$                    |
| -0.07                                                  | $5.00 \times 10^{-16}$ | -0.09, -0.06 | -0.06               | 0.01                   | -8.22       | $2.07 \times 10^{-16}$ |
| Group differences in brain age gap                     |                        |              |                     |                        |             |                        |
| Group                                                  | Mean diff (SD)         |              | $t$                 | $p$                    | Cohen's $d$ |                        |
| > 1 birth                                              | 0.56 (3.76)            |              | 8.27                | $1.54 \times 10^{-16}$ | 0.15        |                        |
| 1-2 births (n = 6945)                                  | 0.50 (2.98)            |              | 7.11                | $1.29 \times 10^{-12}$ | 0.17        |                        |
| 3-4 births (n = 2497)                                  | 0.72 (2.99)            |              | 8.42                | $4.93 \times 10^{-17}$ | 0.24        |                        |
| 5-8 births (n = 126)                                   | 0.82 (2.96)            |              | 3.02                | $2.53 \times 10^{-3}$  | 0.28        |                        |

**Table 1:** Results from the group classification and brain age prediction, including correlation analyses, logistic regression, and differences in brain age gap between the subgroups of parous women compared to nulliparous women, respectively. SE = standard error. Number of women with > 1 birth = 9568, nulliparous women = 2453.

54 The mean polygenic scores for number of births in each of the subgroups are shown in Figure 2. A  
55 positive correlation was found between polygenic scores and number of births ( $r = 0.09$ ,  $p = 3.60 \times 10^{-21}$ ,  
56  $CI = [0.07, 0.11]$ ). The correlation between number of births and classifier probability score persisted  
57 when partialling out polygenic scores ( $r = 0.08$ ,  $p = 1.26 \times 10^{-7}$ ,  $CI = [0.05, 0.11]$ ). Polygenic scores and  
58 classifier probability scores showed a correlation of  $r = 0.04$  ( $p = 0.07$ ,  $CI = [-0.0, 0.08]$ ) for parous women,  
59 and  $r = 0.00$  ( $p = 0.99$ ,  $CI = [-0.04, 0.04]$ ) for nulliparous women (full sample:  $r = 0.03$ ,  $p = 0.07$ ,  $CI =$   
60  $[-0.0, 0.06]$ ). Polygenic scores and brain age gap showed a correlation of  $r = 0.02$  ( $p = 0.06$ ,  $CI = [-0.0,$   
61  $0.04]$ ) for parous women and  $r = 0.04$  ( $p = 0.10$ ,  $CI = [-0.01, 0.08]$ ) for nulliparous women (full sample:  
62  $r = 0.03$ ,  $p = 0.07$ ,  $CI = [-0.0, 0.06]$ ). The correlation between number of births and brain age gap also  
63 persisted when partialling out polygenic scores ( $r = -0.08$ ,  $p = 1.75 \times 10^{-14}$ ,  $CI = [-0.09, -0.06]$ ). To  
64 estimate the genetic overlap between number of births and other traits including height, BMI, education,  
65 schizophrenia, bipolar disorder, and major depression, we used linkage disequilibrium score regression  
66 based on previously published GWAS results [12–17]. The results are provided in Supplementary Figure 1.

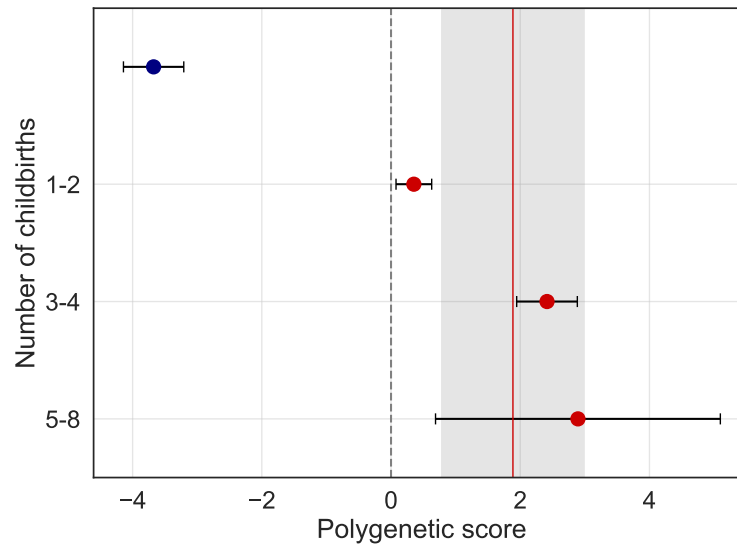

**Figure 2:** The x axis shows the mean polygenic score for number of births in each of the subgroups showed on the y-axis. Red points indicate positive scores, blue points indicate negative scores. The red vertical line and the grey shaded area show the mean polygenic score and the standard deviation in the groups of parous women. The error bars represent the standard error on the means. The dashed line indicates 0 on the x-axis.

67 Summarized, the results show that parity can be linked to women’s brain structure in midlife, in line  
68 with a recent analysis that tested for associations between brain age and a range of phenotypes in the  
69 UK Biobank [18]. We found no evidence that common polygenic variation or confound variables (see  
70 Supplementary Material) could fully explain the differences in brain age gap between parous and nulli-  
71 parous women. In light of the existing literature, the findings indicate that parity involves long-lasting  
72 changes in brain structure [8, 24–28] that may entail a protective effect on brain health later in life [9,  
73 29]. Such enduring effects may also be more prominent following multiple childbirths, as multiparous  
74 women were more likely to be classified as parous based on their brain characteristics, and also had the  
75 ‘youngest-looking’ brains in terms of brain age gap.

76 Endocrinological modulations play an important role in the increased brain plasticity that occur  
77 during and after pregnancy [26, 28]. Changes in sex steroid hormones are known to influence human  
78 brain structure through regulation of neuronal morphology [30–32], and hormones such as estradiol,

79 progesterone, prolactin, oxytocin, and cortisol are known to regulate brain plasticity [26, 30]. Hormonal  
80 profiles are thus likely to contribute to maternal brain adaptations during pregnancy and postpartum,  
81 and their fluctuations may have long-term implications for brain health. Lifetime duration of endogenous  
82 exposure to estrogen, which has neuroprotective effects, has been linked to risk for Alzheimer’s disease  
83 (AD) later in life [33].

84 Another proposed mechanism for enduring effects is the long-lasting presence of fetal cells in the ma-  
85 ternal body [34–36], and such fetal microchimerism provides an avenue for biological interactions between  
86 fetal and maternal cells long after delivery. In an evolutionary framework, this has been conceptualized as  
87 a mother-offspring negotiation [35], providing an intriguing link to the maternal immune system. There is  
88 strong evidence for a crucial role of immune factors in pregnancy [37], which represents a state of low-level  
89 inflammation characterized by a balance between anti-inflammatory and pro-inflammatory cytokines [1,  
90 38]. Pregnancy is known to influence and modify inflammatory disease activity and symptomology in  
91 conditions such as multiple sclerosis, asthma, and rheumatoid arthritis [39], and the pregnancy-induced  
92 increase in concentration of regulatory T cells may have implications for inflammatory susceptibility later  
93 in life. A higher cumulative time spent pregnant in the first trimester, which is when the proliferation  
94 of regulatory T cells is highest, has been shown to protect against AD [39], of which the pathogenesis is  
95 known to involve inflammatory processes [40]. Genetic differences have also been shown to interact with  
96 age and parity to influence AD neuropathology, cognitive function, and expression of proteins related  
97 to synaptic plasticity in mice [41], indicating differential genotype-dependent effects of parity on brain  
98 health across life.

99 In conclusion, our results provide evidence that parity is linked to brain health in midlife, and  
100 that this association cannot be explained by common genetic variability. Parity may thus involve neural  
101 changes that extend beyond the postpartum period and confer a protective effect on the aging brain.



## 102 Acknowledgements

103 This research has been conducted using the UK Biobank Resource under Application Number 27412,  
104 and was supported by the Research Council of Norway (273345, 249795, 276082), the South-East Norway  
105 Regional Health Authority (2015073), and the European Research Council (ERC StG 802998).

---

## References

1. Hillerer, K. M., Jacobs, V. R., Fischer, T. & Aigner, L. *Neural plasticity* **2014** (2014).
2. Rolls, A, Schori, H, London, A & Schwartz, M. *Molecular psychiatry* **13**, 468 (2008).
3. Kinsley, C. H. *et al. Hormones and behavior* **49**, 131–142 (2006).
4. Oatridge, A. *et al. American Journal of Neuroradiology* **23**, 19–26 (2002).
5. Kim, P., Dufford, A. J. & Tribble, R. C. *Brain Structure and Function* **223**, 3267–3277 (2018).
6. Kim, P. *et al. Behavioral neuroscience* **124**, 695 (2010).
7. Duarte-Guterman, P., Leuner, B. & Galea, L. A. *Frontiers in neuroendocrinology* (2019).
8. Hoekzema, E. *et al. Nature Neuroscience* **20**, 287 (2017).
9. Orchard, E. R. *et al. bioRxiv*, 589283 (2019).
10. Pawluski, J. L., Lambert, K. G. & Kinsley, C. H. *Hormones and behavior* **77**, 86–97 (2016).
11. Barban, N. *et al. Nature genetics* **48**, 1462 (2016).
12. Lee, J. J. *et al. Nature genetics* **50**, 1112 (2018).
13. Bulik-Sullivan, B. K. *et al. Nat Genet* **47**, 291–5 (2015).
14. Wray, N. R. *et al. Nature genetics* **50**, 668 (2018).
15. Wood, A. R. *et al. Nature genetics* **46**, 1173 (2014).
16. Locke, A. E. *et al. Nature* **518**, 197 (2015).
17. Stahl, E. A. *et al. Nature genetics*, 1 (2019).
18. Smith, S. M., Vidaurre, D., Alfaró-Almagro, F., Nichols, T. E. & Miller, K. L. *BioRxiv*, 560151 (2019).
19. Le, T. T. *et al. Frontiers in aging neuroscience* **10** (2018).
20. Cole, J. H., Leech, R., Sharp, D. J. & Initiative, A. D. N. *Annals of neurology* **77**, 571–581 (2015).
21. Cole, J. H. *et al. NeuroImage* **163**, 115–124 (2017).
22. Cole, J. H. *et al. Molecular psychiatry* **23**, 1385 (2018).
23. Hedges, L. V. & Olkin, I. *Statistical methods for meta-analysis* (Academic press, 2014).
24. Barha, C. K., Lieblich, S. E., Chow, C. & Galea, L. A. *Neurobiology of aging* **36**, 2391–2405 (2015).
25. Champagne, F. A. & Curley, J. P. *New directions for child and adolescent development* **2016**, 9–21 (2016).
26. Galea, L. A., Leuner, B. & Slattery, D. A. *Journal of neuroendocrinology* **26**, 641–648 (2014).
27. Kim, P., Strathearn, L. & Swain, J. E. *Hormones and behavior* **77**, 113–123 (2016).
28. Kinsley, C. H. & Lambert, K. G. *Journal of neuroendocrinology* **20**, 515–525 (2008).
29. Kinsley, C. H., Franssen, R. A. & Meyer, E. A. in *Behavioral Neurobiology of Aging* 317–345 (Springer, 2011).

30. Simerly, R. B. *Annual review of neuroscience* **25**, 507–536 (2002).
31. Peper, J., Pol, H. H., Crone, E. & Van Honk, J. *Neuroscience* **191**, 28–37 (2011).
32. Toffoletto, S., Lanzenberger, R., Gingnell, M., Sundström-Poromaa, I. & Comasco, E. *Psychoneuroendocrinology* **50**, 28–52 (2014).
33. Fox, M., Berzuini, C. & Knapp, L. A. *Psychoneuroendocrinology* **38**, 2973–2982 (2013).
34. Barha, C. K. & Galea, L. A. *Nature neuroscience* **20**, 134 (2017).
35. Boddy, A. M., Fortunato, A., Wilson Sayres, M. & Aktipis, A. *BioEssays* **37**, 1106–1118 (2015).
36. Zeng, X. X. *et al. Stem cells and development* **19**, 1819–1830 (2010).
37. Mor, G., Cardenas, I., Abrahams, V. & Guller, S. *Annals of the New York Academy of Sciences* **1221**, 80–87 (2011).
38. Luppi, P. *Vaccine* **21**, 3352–3357 (2003).
39. Fox, M., Berzuini, C., Knapp, L. A. & Glynn, L. M. *American Journal of Alzheimer's Disease & Other Dementias®* **33**, 516–526 (2018).
40. Wyss-Coray, T. & Rogers, J. *Cold Spring Harbor perspectives in medicine* **2**, a006346 (2012).
41. Cui, J. *et al. Molecular neurobiology* **49**, 103–112 (2014).
42. Fischl, B. *et al. Neuron* **33**, 341–355 (2002).
43. Kaufmann, T. *et al. bioRxiv*, 303164 (2018).
44. Glasser, M. F. *et al. Nature* **536**, 171 (2016).
45. Rosen, A. F. *et al. Neuroimage* **169**, 407–418 (2018).
46. Rousselet, G. A., Pernet, C. R. & Wilcox, R. R. *European Journal of Neuroscience* **46**, 1738–1748 (2017).
47. Chang, C. C. *et al. Gigascience* **4**, 7 (2015).
48. Bulik-Sullivan, B. *et al. Nature genetics* **47**, 1236 (2015).
49. Euesden, J., Lewis, C. M. & O'reilly, P. F. *Bioinformatics* **31**, 1466–1468 (2014).
50. Alnæs, D. *et al. JAMA psychiatry* (2019).

106 **Online Methods**

107 **Sample**

108 The sample was drawn from the UK Biobank ([www.ukbiobank.ac.uk](http://www.ukbiobank.ac.uk)), and included 12,021 women.

109 Sample demographics are provided in Table 2 and 3.

| Births | N    | Age (M ± SD) | Ethnic background %                  | Educational qualification %             |
|--------|------|--------------|--------------------------------------|-----------------------------------------|
| 0      | 2453 | 52.79 (7.23) | W97.02 B0.78 M0.73 A0.65 C0.37 O0.37 | U51.90 A13.58 O20.42 C3.67 N2.41 P4.81  |
| >1     | 9568 | 55.23 (7.22) | W97.55 B0.52 M0.46 A0.68 C0.36 O0.40 | U40.52 A14.14 O23.06 C4.54 N3.58 P6.26  |
| 1-2    | 6945 | 54.90 (7.17) | W97.65 B0.53 M0.46 A0.59 C0.42 O0.30 | U40.58 A14.27 O23.31 C4.84 N3.50 P5.86  |
| 3-4    | 2497 | 56.10 (7.30) | W97.28 B0.52 M0.48 A0.92 C0.20 O0.60 | U40.45 A13.86 O22.39 C3.80 N3.80 P7.17  |
| 5-8    | 126  | 56.33 (6.96) | W97.62 B0.00 M0.00 A0.79 C0.00 O1.50 | U38.89 A12.70 O22.22 C2.38 N3.97 P10.32 |

**Table 2:** Demographics for each group. M ± SD = mean ± standard deviation.

Ethnic background: W = white, B = black, M = mixed, A = Asian, C = Chinese, O = other. Educational qualification: U = university/college degree, A = A levels or equivalent, O = O levels/GCSE or equivalent, C = CSE or equivalent, N = NVQ/HNS/HNS or equivalent, P = professional qualification, e.g. nursing/teaching. For the categories, see <http://biobank.ctsu.ox.ac.uk/crystal/coding.cgi?id=100305> and <http://biobank.ctsu.ox.ac.uk/crystal/coding.cgi?id=1001>

| Births | N    | Age at first birth   Years since first birth |
|--------|------|----------------------------------------------|
| >1     | 7935 | 26.09 (4.52)   29.43 (9.21)                  |
| 1-2    | 5313 | 26.81 (4.54)   28.42 (9.23)                  |
| 3-4    | 2496 | 24.72 (4.11)   31.38 (8.89)                  |
| 5-8    | 126  | 22.94 (3.70)   33.38 (7.24)                  |

**Table 3:** Age at first birth and years since first birth (M ± SD) for each group, including only subjects with available data.

110 **MRI processing**

111 Raw T1-weighted MRI data for all participants were processed using a harmonized analysis pipeline, in-  
 112 cluding automated surface-based morphometry and subcortical segmentation as implemented in FreeSurfer  
 113 5.3 [42]. In line with a recent large-scale implementation [43], we utilized a fine-grained cortical parcellation  
 114 scheme [44] to extract cortical thickness, area, and volume for 180 regions of interest per hemisphere, in

115 addition to the classic set of subcortical and cortical summary statistics from FreeSurfer [42]. This yielded  
116 a total set of 1118 structural brain imaging features (360/360/360/38 for cortical thickness/area/volume,  
117 as well as cerebellar/subcortical and cortical summary statistics, respectively).

118 To remove outliers, the Euler numbers [45] were extracted from FreeSurfer and averaged across the  
119 left and right hemispheres. The average values were then residualized with respect to age and scanning site  
120 using linear models, before subjects with average Euler numbers of  $SD \pm 4$  were identified and excluded  
121 ( $n = 109$ ). In addition, subjects with  $SD \pm 4$  on the global MRI measures mean cortical or subcortical  
122 gray matter volume were excluded ( $n = 10$  and  $n = 12$ , respectively), yielding a total of 12,021 subjects  
123 for the main analyses.

124 As a data quality cross check, the main analyses (binary classification and brain age prediction) were  
125 re-run using MRI data that was first residualized with respect to the average Euler numbers in addition  
126 to the other covariates. In brief, the results were consistent with the main findings (see Supplementary  
127 Table 1 for full results).

128 For the binary classification, we residualized all variables with respect to age, scanning site, ethnic  
129 background, education, and ICV using linear models. For the brain age prediction, we residualized all  
130 variables with respect to scanning site, ethnic background, education, and ICV using linear models.

### 131 **Principal component analysis**

132 Principal component analyses (PCA) were run with  $z$ -transformed MRI variables  $z = (x - \mu)/\sigma$ , where  
133  $x$  is an MRI variable of mean  $\mu$  and standard deviation  $\sigma$ ). The top 100 components were used in the  
134 subsequent analyses, explaining 56.77% of the total variance for the classifier variables, and 56.78% for the  
135 brain age prediction variables, as shown in Figure 3. As a cross check, the correlations between number of  
136 births and a) classifier prediction value and b) brain age gap were re-run with 200 components, explaining  
137 71.62% and 70.98% of the total variance, respectively. With 200 components included, the correlation  
138 between number of births and classifier prediction value was  $r = 0.04$ ,  $p = 0.01$ ,  $CI = [0.01, 0.06]$ , while

139 the correlation between number of births and brain age gap showed  $r = -0.07$ ,  $p = 2.65 \times 10^{-14}$ , CI =  
140  $[-0.09, -0.05]$ . As the results were consistent, 100 components were chosen to reduce computational time.

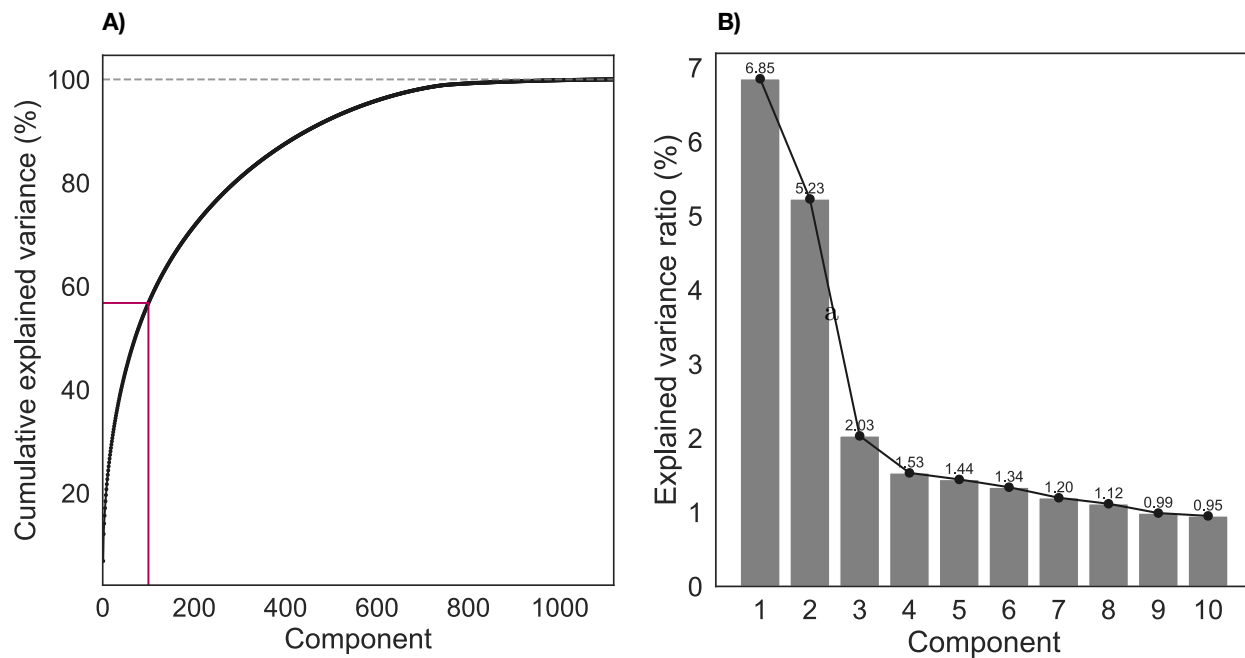

**Figure 3:** A) Cumulative explained variance for the PCA components based on 1118 z-transformed MRI variables used in the brain age analysis. B) Explained variance ratio shown for the top 10 PCA components used in the brain age analysis.

### 141 Binary classification

142 Gradient boosting classification was performed using Scikit-learn (<https://scikit-learn.org>). Parameters  
143 were set to max depth = 1, number of estimators = 100, and learning rate = 0.1 (defaults). To account  
144 for differences in group size, under-sampling was performed using Imbalanced-learn ([https://imbalanced-learn.readthedocs.io/en/stable/user\\_guide.html](https://imbalanced-learn.readthedocs.io/en/stable/user_guide.html)), randomly selecting samples (without replacement) in  
145 order to balance the group size. The classifier probability score was estimated based on a 10-fold cross  
146 validation, assigning a probability of being labeled as parous (having given birth) to each of the subjects.  
147 An average AUC value was generated in the cross validation, and then compared to a null distribution  
148 based on 10,000 permuted datasets. The result is shown in Figure 4.

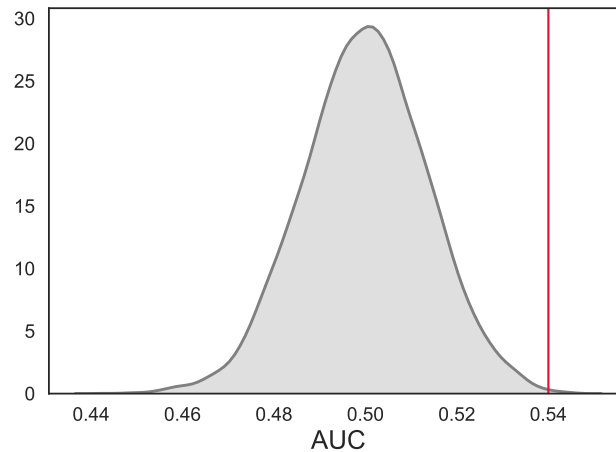

**Figure 4:** Gradient boosting classifier with PCA components based on the MRI data. AUC = 0.54 (SD  $\pm 0.02$ ),  $p = 6.00 \times 10^{-4}$ , based on a 10-fold cross validation (red vertical line). The null distribution calculated from 10,000 permutations is shown in gray, with an average AUC of 0.50 (SD = 0.01).

## 150 Brain age prediction

151 The XGBRegressor model from XGBoost was used to run the brain age prediction analysis  
152 (<https://xgboost.readthedocs.io/en/latest/python/index.html>). Parameters were set to max depth = 3,  
153 number of estimators = 100, and learning rate = 0.1 (defaults). The predicted age based on the PCA  
154 components was estimated in a 10-fold cross validation with 10 repetitions per fold, assigning an estimated  
155 brain age to each individual. Brain age gap was calculated using estimated brain age - true age. The  
156 average RMSE was 5.80, as shown in Figure 5.

157 In order to adjust for a frequently observed bias leading to generally overestimated age predictions at low  
158 age and underestimated predictions at high age [18, 19], we employed the following regression:

$$\text{Predicted age} = A + B \times \text{True Age} + C \times \text{True Age}^2 \quad (1)$$

159 where the coefficients  $A$ ,  $B$  and  $C$  parameterize the relationship between the true and predicted age.  
160 These coefficients were then used to remove the effect of the bias, in order to achieve a linear dependence  
161 with slope = 1 between the true and predicted age values, as illustrated in Figure 6.

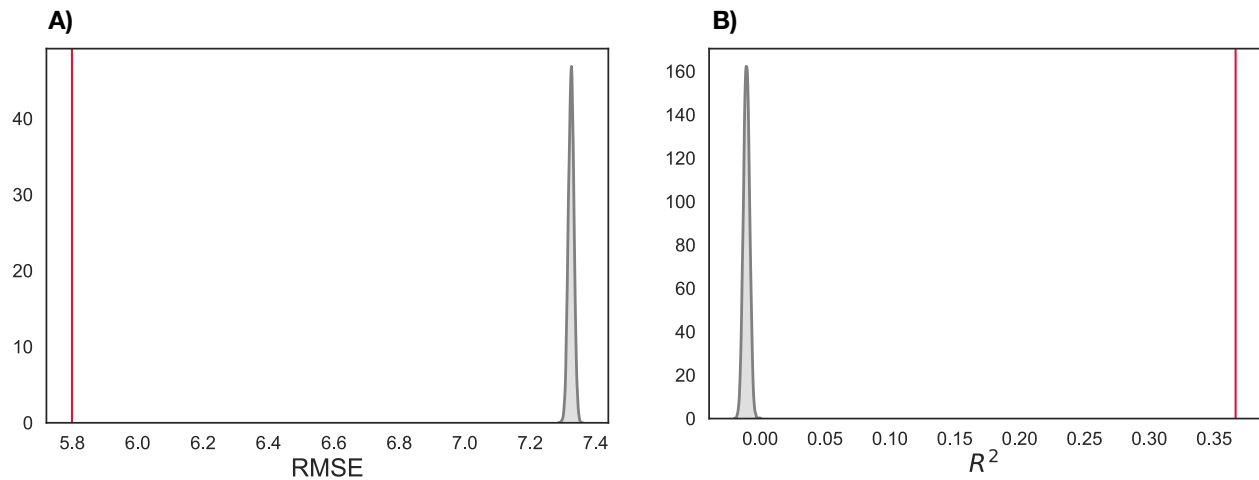

**Figure 5:** A) Average RMSE  $\pm$  SD =  $5.78 \pm 0.10$ ,  $p < 0.0001$ , based on a 10-fold cross validation with 10 repetitions per fold (red vertical line). The null distribution calculated from 10,000 permutations is shown in gray, with an average RMSE of  $7.325 \pm 0.009$ . B) Average  $R^2 = 0.37 \pm 0.02$ ,  $p < 0.0001$ , based on a 10-fold cross validation with 10 repetitions per fold (red vertical line). The null distribution is shown in gray, with an average  $R^2$  of  $-0.011 \pm 0.002$ .

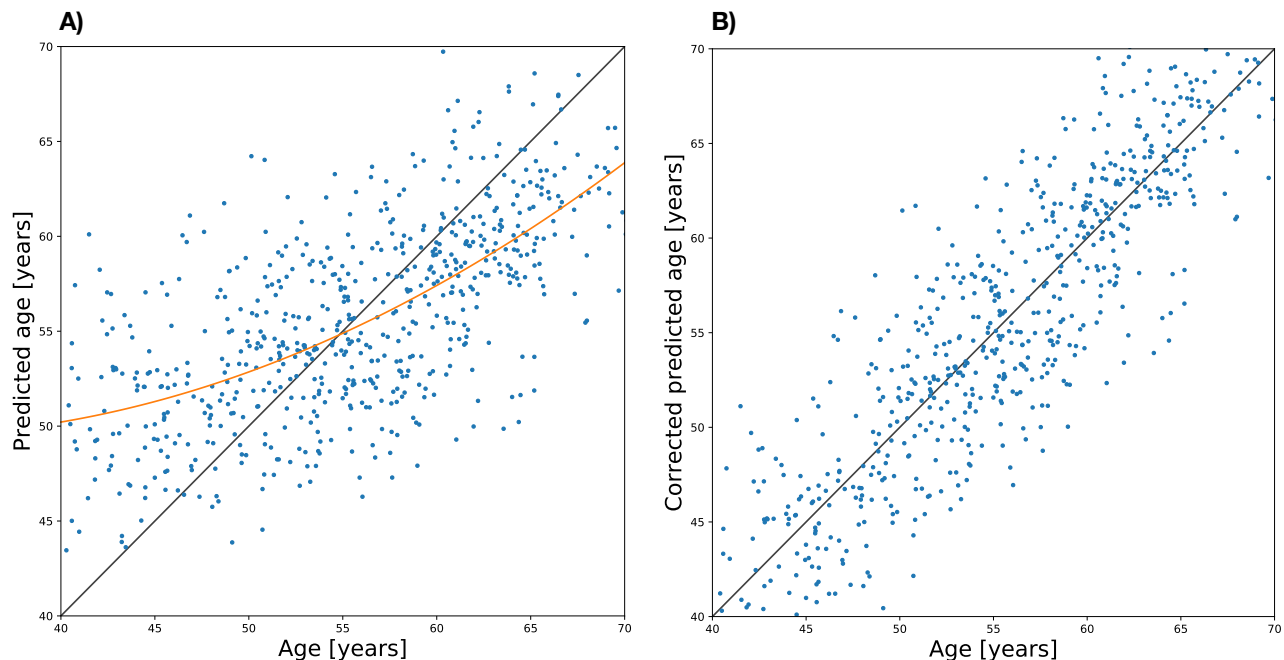

**Figure 6:** A) Machine performance is biased towards the mean age, resulting in overestimated predictions at low age and underestimated predictions at high age. B) After bias correction using Eq. 1, the predictions follow the expected dependence.

162 To assess the reproducibility of the effects, the brain age analysis was rerun using predicted brain age  
163 estimates based on an independent approach and training set from the brainageR software  
164 (<https://github.com/james-cole/brainageR>) [20–22]. The brainageR model is trained on voxel-based  
165 morphometry maps (VBM) based on T1-weighted MRI scans from 2001 healthy individuals (male/female  
166 = 1016/985, mean age  $\pm$  SD =  $36.95 \pm 18.12$ , age range 18–90 years), and uses a Gaussian Processes  
167 regression with the kernlab package in R. See [21] for details.

168 The predicted brain age values from the brainageR dataset were corrected for age using Equation  
169 1, and outliers with a value of  $< 0$  and  $> 90$  were removed ( $n = 15$ ). The brain age that was estimated  
170 using brainageR and the brain age that was estimated using our current approach showed a correlation of  
171  $r = 0.61$ ,  $p = < 0001$ , CI = [0.60, 0.62]. When using the brain age values from the brainageR estimation, a  
172 negative correlation was found between number of childbirths and brain age gap ( $r = 0.04$ ,  $p = 3.00 \times 10^{-6}$ ,  
173 CI = [-0.06, -0.02]), and the group differences showed 0.72 (SD = 8.05) years for  $> 1$  births ( $t = 4.98$ ,  
174  $p = 6.52 \times 10^{-7}$ ,  $d = 0.09$ ), 0.61 (SD = 6.33) years for 1-2 births ( $t = 4.10$ ,  $p = 4.31 \times 10^{-5}$ ,  $d = 0.10$ ),  
175 0.92 (SD = 6.40) years for 3-4 births ( $t = 5.08$ ,  $p = 3.95 \times 10^{-7}$ ,  $d = 0.14$ ), and 2.50 years (SD = 6.48) for  
176 5-8 births,  $t = 4.18$ ,  $p = 3.00 \times 10^{-5}$ ,  $d = 0.38$ ), relative to nulliparous women, respectively. The results  
177 are shown in Figure 7.



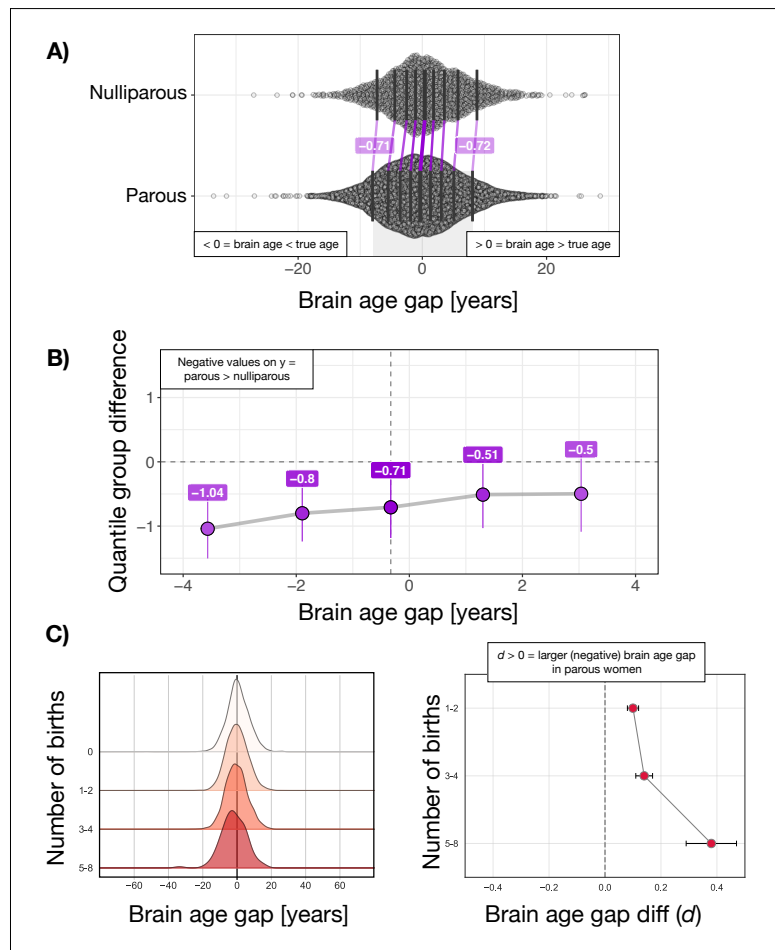

**Figure 7:** A) The distributions of bias corrected brain age gap in nulliparous and parous women. Negative values indicate a predicted brain age that is lower than chronological age, i.e. a ‘younger-looking’ brain. The plot shows a uniform, negative shift in the group of parous women. B) The y-axis shows the differences between deciles (parous group minus nulliparous group), while the x-axis shows the deciles of the parous group. C) The distribution of brain age gap in subgroups of women based on number of childbirths. The plot shows a negative shift in the distribution with a larger number of births. Number of subjects: nulliparous women = 2453, 1-2 births = 6945, 3-4 births = 2497, and 5-8 births = 126. Darker color indicates a larger number of births. C). Left plot: The distribution of estimated brain age gap in subgroups of women based on number of childbirths. The plot shows a negative shift in the distribution with a larger number of births. Darker color indicates a larger number of births. Right plot: Difference in brain age gap between each of the subgroups and nulliparous women as indexed by Cohen’s  $d$ . The error bars represent the standard deviation of the effect size [23]. Higher values on the x-axis indicate a larger effect size. The dashed line indicates 0 on the y-axis.

178 The differences between the quantiles of the groups of parous and nulliparous women were investigated  
 179 using the shift function in the Robust Graphical Methods For Group Comparisons package in R [46]  
 180 (<https://github.com/GRousselet/rogme>). In brief, the shift function shows the difference between the  
 181 quantiles of two groups as a function of the quantiles of one group.

182 **Genome-wide association study (GWAS)**

183 A GWAS was run on the women in the UK Biobank cohort ( $n = 271,312$ , excluding the MRI subsample),  
184 using PLINK 2.0 [47] and the UKB v3 imputed genetic data, filtering out SNPs with a minor allele  
185 frequency below 0.001 or failing the Hardy-Weinberg equilibrium test at  $p < 1.00 \times 10^{-9}$ . Non-Caucasians  
186 and individuals with a brain disorder as indicated by ICD10 were excluded from the study. We then ran  
187 a linear regression on the continuous measure number of childbirths, covarying for age and the first ten  
188 genetic principal components, as provided by UK Biobank under field 22009. PRSice v1.25 [49] was used  
189 to calculate polygenic scores for number of births across  $p$ -value thresholds from 0.001 to 0.5, with intervals  
190 of 0.001, using PRSice default settings. This includes the removal of the major histocompatibility complex  
191 (MHC; chromosome 6, 26-33Mb) and thinning of SNPs based on linkage disequilibrium and  $p$ -value. A  
192 PCA was run on the polygenic scores across all  $p$ -value levels [50], and the first component explaining  
193 92.24% of the total variance was used in the subsequent analyses. The PCA component correlated  $r = 0.9$   
194 with the PGS at threshold  $p = .05$ . Cross-trait linkage disequilibrium score regression [48] was applied to  
195 calculate genetic correlation between number of children and height, BMI, education, major depressive  
196 disorder, schizophrenia, and bipolar disorder [12–17].

197 Supplementary material

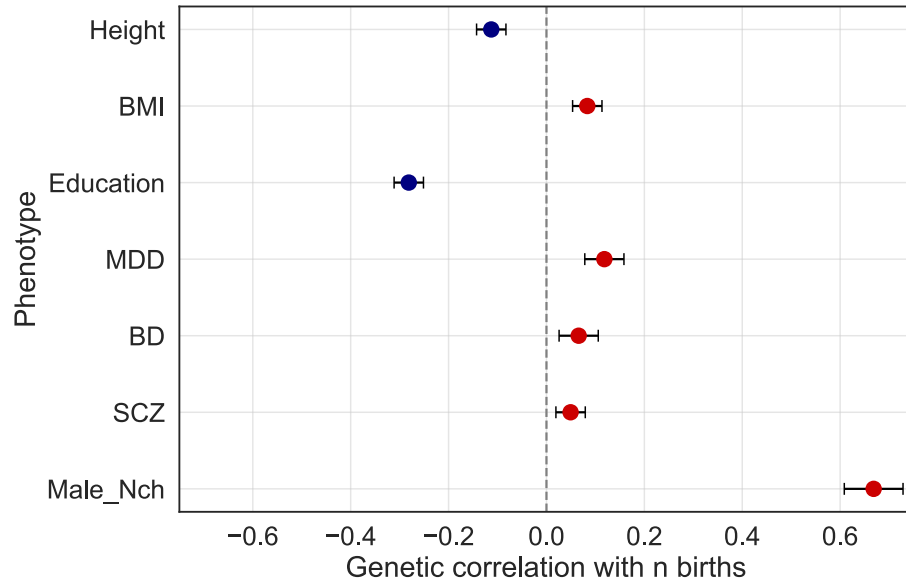

**Supplementary Figure 1:** Genetic overlap between number of childbirths and other traits. Red points indicate positive correlation, blue points indicate negative correlation. The error bars indicate the standard error. BMI = Body mass index, MDD = Major depressive disorder, BD = Bipolar disorder, SCZ = Schizophrenia, Male\_Nch = male number of children fathered. Linkage disequilibrium score regression revealed genetic correlations between number of childbirths and height ( $r_g = -0.11$  (SE = 0.03),  $p = 1.31 \times 10^{-5}$ ), BMI ( $r_g = 0.08$  (SE = 0.03),  $p = 5.40 \times 10^{-3}$ ), education ( $r_g = -0.28$  (SE = 0.03),  $p = 4.32 \times 10^{-28}$ ), and major depressive disorder ( $r_g = 0.12$  (SE = 0.04),  $p = 9.15 \times 10^{-4}$ ). The genetic correlation between parity and bipolar disorder ( $r_g = 0.07$  (SE = 0.04),  $p = 0.11$ ), and schizophrenia ( $r_g = 0.05$  (SE = 0.03),  $p = 0.14$ ) did not survive Bonferroni correction ( $p$  threshold = 0.007). A genetic correlation of  $r_g = 0.67$  (SE = 0.06),  $p = 9.30 \times 10^{-30}$  was found for number of births in women and number of children fathered in men.

| Classifier probability score and number of childbirths |                        |              |                     |                        |             |                        |
|--------------------------------------------------------|------------------------|--------------|---------------------|------------------------|-------------|------------------------|
| Pearson's $r$                                          |                        |              | Logistic regression |                        |             |                        |
| $r$                                                    | $p$                    | 95% CI       | $\beta$             | SE                     | $z$         | $p$                    |
| 0.06                                                   | $8.00 \times 10^{-6}$  | 0.04, 0.09   | 2.18                | 0.70                   | 3.11        | $1.86 \times 10^{-3}$  |
| Brain age gap and number of childbirths                |                        |              |                     |                        |             |                        |
| $r$                                                    | $p$                    | 95% CI       | $\beta$             | SE                     | $z$         | $p$                    |
| -0.08                                                  | $1.62 \times 10^{-16}$ | -0.09, -0.06 | -0.06               | 0.01                   | -8.60       | $7.76 \times 10^{-18}$ |
| Group differences in brain age gap                     |                        |              |                     |                        |             |                        |
| Group                                                  | Mean diff (SD)         |              | $t$                 | $p$                    | Cohen's $d$ |                        |
| > 1 birth                                              | 0.60 (3.86)            |              | 8.66                | $5.45 \times 10^{-18}$ | 0.16        |                        |
| 1-2 births (n = 6945)                                  | 0.55 (3.06)            |              | 7.67                | $1.94 \times 10^{-14}$ | 0.18        |                        |
| 3-4 births (n = 2497)                                  | 0.72 (3.07)            |              | 8.30                | $1.39 \times 10^{-16}$ | 0.24        |                        |
| 5-8 births (n = 126)                                   | 0.85 (3.06)            |              | 3.03                | $2.49 \times 10^{-3}$  | 0.28        |                        |

**Supplementary Table 1:** Correcting for Euler numbers to control for data quality. The classification and brain age prediction analyses were re-run using MRI data that were residualized with respect to the Euler numbers in addition to the other covariates using linear models. Outliers were identified and removed using the procedure described in Online Methods. The top 100 variables from a PCA were included in the regressor. The table shows the results from correlation analyses and logistic regression, and differences in brain age gap between each group of parous women compared to nulliparous women, respectively. The estimated brain age was corrected for age using Equation 1 in the Online Methods. Number of women with > 1 birth = 9568, nulliparous women = 2453.

| Brain age gap and number of childbirths |                        |              |         |                        |             |                        |
|-----------------------------------------|------------------------|--------------|---------|------------------------|-------------|------------------------|
| $r$                                     | $p$                    | 95% CI       | $\beta$ | SE                     | $z$         | $p$                    |
| -0.07                                   | $2.34 \times 10^{-14}$ | -0.09, -0.05 | -0.06   | 0.01                   | -7.73       | $1.06 \times 10^{-14}$ |
| Group differences in brain age gap      |                        |              |         |                        |             |                        |
| Group                                   | Mean diff (SD)         |              | $t$     | $p$                    | Cohen's $d$ |                        |
| > 1 birth                               | 0.53 (3.77)            |              | 7.77    | $8.31 \times 10^{-15}$ | 0.14        |                        |
| 1-2 births (n = 6779)                   | 0.48 (2.97)            |              | 6.75    | $1.62 \times 10^{-11}$ | 0.16        |                        |
| 3-4 births (n = 2428)                   | 0.68 (3.00)            |              | 7.80    | $7.75 \times 10^{-15}$ | 0.22        |                        |
| 5-8 births (n = 123)                    | 0.73 (2.98)            |              | 2.67    | $2.71 \times 10^{-3}$  | 0.25        |                        |

**Supplementary Table 2:** Ethnic background. The brain age analysis was re-run on white subjects only. Outliers were identified and removed using the procedure described in Online Methods. The top 100 variables from a PCA were included in the regressor. The estimated brain age was corrected for age using Equation 1 in the Online Methods. The table shows the results from correlation analyses and logistic regression for the white subsample. Number of women with > 1 birth = 9330, nulliparous women = 2378.

| University/college. N = 3877 parous and 1273 nulliparous women                |                       |              |         |      |          |                       |
|-------------------------------------------------------------------------------|-----------------------|--------------|---------|------|----------|-----------------------|
| Brain age gap and number of childbirths                                       |                       |              |         |      |          |                       |
| <i>r</i>                                                                      | <i>p</i>              | 95% CI       | $\beta$ | SE   | <i>z</i> | <i>p</i>              |
| -0.07                                                                         | $2.00 \times 10^{-6}$ | -0.09, -0.04 | -0.07   | 0.01 | -4.28    | $1.86 \times 10^{-5}$ |
| A level. N = 1353 parous and 333 nulliparous women                            |                       |              |         |      |          |                       |
| Brain age gap and number of childbirths                                       |                       |              |         |      |          |                       |
| <i>r</i>                                                                      | <i>p</i>              | 95% CI       | $\beta$ | SE   | <i>z</i> | <i>p</i>              |
| -0.09                                                                         | $2.85 \times 10^{-4}$ | -0.14, -0.04 | -0.07   | 0.02 | -3.63    | $2.84 \times 10^{-4}$ |
| O level or equivalent. N = 2640 parous and 591 nulliparous women              |                       |              |         |      |          |                       |
| Brain age gap and number of childbirths                                       |                       |              |         |      |          |                       |
| <i>r</i>                                                                      | <i>p</i>              | 95% CI       | $\beta$ | SE   | <i>z</i> | <i>p</i>              |
| -0.07                                                                         | $1.29 \times 10^{-4}$ | -0.10, -0.03 | -0.06   | 0.01 | -4.02    | $5.90 \times 10^{-5}$ |
| Other professional (NVQ or similar). N = 942 parous and 177 nulliparous women |                       |              |         |      |          |                       |
| Brain age gap and number of childbirths                                       |                       |              |         |      |          |                       |
| <i>r</i>                                                                      | <i>p</i>              | 95% CI       | $\beta$ | SE   | <i>z</i> | <i>p</i>              |
| -0.01                                                                         | 0.70                  | -0.07, 0.05  | -0.03   | 0.03 | -1.01    | 0.31                  |

**Supplementary Table 3:** Education. A higher level of education was related to a lower number of childbirths ( $r = -0.096$ ,  $p = 3.32 \times 10^{-26}$ , CI = [0.08, 0.11]). The brain age analysis was re-run within groups of women with a) university or college level education, b) A levels, c) O levels or equivalent, and d) other professional qualifications (NVQ or similar). Outliers were identified and removed using the procedure described in Online Methods. The top 100 variables from a PCA were included in the regressor. The estimated brain age was corrected for age using Equation 1 in the Online Methods. The table shows the results from correlation analyses and logistic regression within each of the educational categories.

| BMI < 18.5. N = 53 parous and 12 nulliparous women       |                       |              |         |      |          |                       |
|----------------------------------------------------------|-----------------------|--------------|---------|------|----------|-----------------------|
| Brain age gap and number of childbirths                  |                       |              |         |      |          |                       |
| <i>r</i>                                                 | <i>p</i>              | 95% CI       | $\beta$ | SE   | <i>z</i> | <i>p</i>              |
| -0.04                                                    | 0.74                  | -0.28, 0.20  | 0.002   | 0.10 | 0.02     | 0.99                  |
| BMI 18.5 - 25. N = 3086 parous and 790 nulliparous women |                       |              |         |      |          |                       |
| Brain age gap and number of childbirths                  |                       |              |         |      |          |                       |
| <i>r</i>                                                 | <i>p</i>              | 95% CI       | $\beta$ | SE   | <i>z</i> | <i>p</i>              |
| -0.06                                                    | $6.40 \times 10^{-5}$ | -0.10, -0.03 | -0.07   | 0.01 | -5.33    | $9.96 \times 10^{-8}$ |
| BMI 26 - 30. N = 3076 parous and 842 nulliparous women   |                       |              |         |      |          |                       |
| Brain age gap and number of childbirths                  |                       |              |         |      |          |                       |
| <i>r</i>                                                 | <i>p</i>              | 95% CI       | $\beta$ | SE   | <i>z</i> | <i>p</i>              |
| -0.08                                                    | $7.79 \times 10^{-7}$ | -0.11, -0.05 | -0.06   | 0.01 | -4.82    | $1.43 \times 10^{-6}$ |
| BMI > 30. N = 2351 parous and 563 nulliparous women      |                       |              |         |      |          |                       |
| Brain age gap and number of childbirths                  |                       |              |         |      |          |                       |
| <i>r</i>                                                 | <i>p</i>              | 95% CI       | $\beta$ | SE   | <i>z</i> | <i>p</i>              |
| -0.06                                                    | $1.58 \times 10^{-3}$ | -0.09, -0.02 | -0.05   | 0.02 | -3.29    | $1.66 \times 10^{-3}$ |

**Supplementary Table 4:** Body mass index (BMI). The general relationship between brain age gap and number of births persisted when correcting for BMI ( $r = -0.07$ ,  $p = 5.73 \times 10^{-16}$ ,  $CI = [-0.09, -0.06]$ ). To further investigate the influence of BMI, the brain age analysis was re-run within groups of women with BMI values of a) < 18.5, b) 18.5 - 25, c) 26 - 30, and d) > 30. Outliers were identified and removed using the procedure described in Online Methods. The top 100 variables from a PCA were included in the regressor. The estimated brain age was corrected for age using Equation 1 in the Online Methods. The table shows the results from correlation analyses and logistic regression within each of the BMI categories. 65 women had BMI below 18.5 (minimum BMI = 15), constituting a group that was too small to run with PCA. In this group, all the MRI variables were included.

| AFB < 22 years. N = 1280 parous and 2453 nulliparous women  |                        |              |          |                        |                  |                        |
|-------------------------------------------------------------|------------------------|--------------|----------|------------------------|------------------|------------------------|
| Brain age gap and number of childbirths                     |                        |              |          |                        |                  |                        |
| <i>r</i>                                                    | <i>p</i>               | 95% CI       | $\beta$  | SE                     | <i>z</i>         | <i>p</i>               |
| -0.10                                                       | $6.91 \times 10^{-10}$ | -0.13, -0.07 | -0.07    | 0.01                   | -6.04            | $1.59 \times 10^{-9}$  |
| Group differences in brain age gap                          |                        |              |          |                        |                  |                        |
| Group                                                       | Mean diff (SD)         |              | <i>t</i> | <i>p</i>               | Cohen's <i>d</i> |                        |
| > 1 birth                                                   | 0.63 (2.47)            |              | 6.09     | $1.22 \times 10^{-9}$  | 0.25             |                        |
| 1-2 births (n = 649)                                        | 0.55 (2.97)            |              | 4.16     | $3.34 \times 10^{-5}$  | 0.18             |                        |
| 3-4 births (n = 580)                                        | 0.66 (2.97)            |              | 4.85     | $1.29 \times 10^{-6}$  | 0.22             |                        |
| 5-8 births (n = 51)                                         | 1.02 (2.95)            |              | 2.88     | $4.00 \times 10^{-3}$  | 0.41             |                        |
| AFB 22-29 years. N = 5013 parous and 2453 nulliparous women |                        |              |          |                        |                  |                        |
| Brain age gap and number of childbirths                     |                        |              |          |                        |                  |                        |
| <i>r</i>                                                    | <i>p</i>               | 95% CI       | $\beta$  | SE                     | <i>z</i>         | <i>p</i>               |
| -0.10                                                       | $9.98 \times 10^{-18}$ | -0.12, -0.08 | -0.07    | 0.01                   | -9.14            | $6.03 \times 10^{-30}$ |
| Group differences in brain age gap                          |                        |              |          |                        |                  |                        |
| Group                                                       | Mean diff (SD)         |              | <i>t</i> | <i>p</i>               | Cohen's <i>d</i> |                        |
| > 1 birth                                                   | 0.69 (3.51)            |              | 9.25     | $2.98 \times 10^{-20}$ | 0.20             |                        |
| 1-2 births (n = 3297)                                       | 0.64 (3.01)            |              | 7.92     | $1.17 \times 10^{-12}$ | 0.19             |                        |
| 3-4 births (n = 1646)                                       | 0.79 (3.05)            |              | 8.18     | $3.64 \times 10^{-16}$ | 0.26             |                        |
| 5-8 births (n = 70)                                         | 0.70 (3.03)            |              | 1.90     | 0.06                   | 0.23             |                        |
| AFB > 30 years. N = 1642 parous and 2453 nulliparous women  |                        |              |          |                        |                  |                        |
| Brain age gap and number of childbirths                     |                        |              |          |                        |                  |                        |
| <i>r</i>                                                    | <i>p</i>               | 95% CI       | $\beta$  | SE                     | <i>z</i>         | <i>p</i>               |
| -0.06                                                       | $5.60 \times 10^{-5}$  | -0.09, -0.03 | -0.04    | 0.01                   | -3.99            | $6.72 \times 10^{-5}$  |
| Group differences in brain age gap                          |                        |              |          |                        |                  |                        |
| Group                                                       | Mean diff (SD)         |              | <i>t</i> | <i>p</i>               | Cohen's <i>d</i> |                        |
| > 1 birth                                                   | 0.37 (2.57)            |              | 4.00     | $6.42 \times 10^{-5}$  | 0.14             |                        |
| 1-2 births (n = 1367)                                       | 0.34 (2.88)            |              | 3.49     | $4.89 \times 10^{-4}$  | 0.12             |                        |
| 3-4 births (n = 270)                                        | 0.53 (2.86)            |              | 2.88     | $4.03 \times 10^{-3}$  | 0.18             |                        |
| 5-8 births (n = 5)                                          | -1.07 (2.87)           |              | -0.83    | 0.41                   | 0.37             |                        |

**Supplementary Table 5:** Age at first childbirth (AFB). The correlation between brain age gap and number of births was  $r = 0.02$ ,  $p = 0.06$ ,  $CI = [-0.04, -0.0]$  when correcting for AFB in an analysis including only the parous women. To further investigate the influence of AFB, the brain age analysis was re-run within groups of women with AFB at a) < 22 years, b) 22 - 29 years, and c) > 30 years, as compared to nulliparous women, respectively, in a subsample including the nulliparous women and the parous women who had data on AFB ( $N = 8017$ ). Outliers were identified and removed using the procedure described in Online Methods. The top 100 variables from a PCA were included in the regressor. The estimated brain age was corrected for age using Equation 1 in the Online Methods. The table shows the results from correlation analyses, logistic regression, and differences in brain age gap between each of the groups of parous women compared to nulliparous women, respectively, within each of the AFB categories.
